# Supplementary material
Source: publisher figshare collection journal article supplement (https://diabetesjournals.figshare.com/articles/dataset/_/12040752)
Supplement: Supplementary file 1 [file 3]

## Checklist for Reporting Human Islet Preparations Used in Research

Adapted from Hart NJ, Powers AC (2018) Progress, challenges, and suggestions for using human islets to understand islet biology and human diabetes. Diabetologia <https://doi.org/10.1007/s00125-018-4772-2>.

|                                                                                                                                                                                                                                                                                                                                                                                                                    |                                           |
|--------------------------------------------------------------------------------------------------------------------------------------------------------------------------------------------------------------------------------------------------------------------------------------------------------------------------------------------------------------------------------------------------------------------|-------------------------------------------|
| <b>Manuscript DOI:</b> <a href="https://doi.org/10.2337/DB19-0687">https://doi.org/10.2337/DB19-0687</a>                                                                                                                                                                                                                                                                                                           |                                           |
| <b>Title:</b> Homeostatic functions of macrophages in the human pancreatic islet are regulated by purinergic signals from beta cells                                                                                                                                                                                                                                                                               |                                           |
| <b>Author list:</b> Jonathan R. Weitz <sup>1</sup> , Carol Jacques-Silva <sup>2</sup> , Mirza Muhammed Fahd Qadir <sup>2,3</sup> , Oliver Umland <sup>2</sup> , Elizabeth Pereira <sup>1</sup> , Farhan Qureshi <sup>1,3</sup> , Alejandro Tamayo <sup>1</sup> , Juan Dominguez-Bendala <sup>2,3,5</sup> , Rayner Rodriguez-Diaz <sup>1</sup> , Joana Almaça <sup>1</sup> , Alejandro Caicedo <sup>1,2,3,4,6</sup> |                                           |
| <b>Corresponding author:</b> Jonathan Weitz                                                                                                                                                                                                                                                                                                                                                                        | <b>Email address:</b> jrw64@med.miami.edu |

Formatted: Line spacing: single

| Islet preparation              | 1             | 2             | 3             | 4           | 5 | 6 | 7 | 8 <sup>a</sup> |
|--------------------------------|---------------|---------------|---------------|-------------|---|---|---|----------------|
| MANDATORY INFORMATION          |               |               |               |             |   |   |   |                |
| Unique identifier              | HP18212-01T2D | HP18243-01T2D | HP18275-01T2D | 19051-01T2D |   |   |   |                |
| Donor age (years)              | 40            | 51            | 30            | 53          |   |   |   |                |
| Donor sex (M/F)                | M             | M             | F             | M           |   |   |   |                |
| Donor BMI (kg/m <sup>2</sup> ) | 27.7          | 37.1          | 40.1          | 30.1        |   |   |   |                |

|                                                                             |            |            |            |                              |  |  |  |  |
|-----------------------------------------------------------------------------|------------|------------|------------|------------------------------|--|--|--|--|
| Donor HbA <sub>1c</sub> or other measure of blood glucose control           | 7.4        | 6.2        | 6.5        | 7.8                          |  |  |  |  |
| Origin/source of islets <sup>b</sup>                                        | Prodo      | Prodo      | Prodo      | Prodo                        |  |  |  |  |
| Islet isolation centre                                                      | Prodo Labs | Prodo Labs | Prodo Labs | Prodo Labs                   |  |  |  |  |
| Donor history of diabetes? Yes/No                                           | Yes        | Yes        | Yes        | Yes                          |  |  |  |  |
| <b>If Yes, complete the next two lines if this information is available</b> |            |            |            |                              |  |  |  |  |
| Diabetes duration (years)                                                   | Recent     | NA         | NA         | NA                           |  |  |  |  |
| Glucose-lowering therapy at time of death <sup>c</sup>                      | Diet       | Oral Med.  | Diet       | Oral Med, Glipizide, Januvia |  |  |  |  |

| RECOMMENDED INFORMATION |        |        |        |             |  |  |  |  |
|-------------------------|--------|--------|--------|-------------|--|--|--|--|
| Donor cause of death    | Stroke | Anoxia | Asthma | Head Trauma |  |  |  |  |
| Warm ischaemia time (h) |        |        |        |             |  |  |  |  |
| Cold ischaemia time (h) |        |        |        |             |  |  |  |  |

|                                                                                   |          |          |          |          |  |  |  |  |
|-----------------------------------------------------------------------------------|----------|----------|----------|----------|--|--|--|--|
| Estimated purity (%)                                                              | 80       | 90       | 85       | 80       |  |  |  |  |
| Estimated viability (%)                                                           | 95       | 95       | 95       | 95       |  |  |  |  |
| Total culture time (h) <sup>d</sup>                                               | 12 hours | 12 hours | 12 hours | 12 hours |  |  |  |  |
| Glucose-stimulated insulin secretion or other functional measurement <sup>e</sup> |          |          |          |          |  |  |  |  |
| Handpicked to purity? Yes/No                                                      |          |          |          |          |  |  |  |  |
| Additional notes                                                                  |          |          |          |          |  |  |  |  |

<sup>a</sup>If you have used more than eight islet preparations, please complete additional forms as necessary

<sup>b</sup>For example, IIDP, ECIT, Alberta IsletCore

<sup>c</sup>Please specify the therapy/therapies

<sup>d</sup>Time of islet culture at the isolation centre, during shipment and at the receiving laboratory

<sup>e</sup>Please specify the test and the results
