# Supplementary material
Source: publisher figshare collection journal article supplement (https://diabetesjournals.figshare.com/articles/dataset/_/12040752)
Supplement: Supplementary file 3 [file 3]

## SUPPLEMENTARY MATERIAL

**Figure S1**

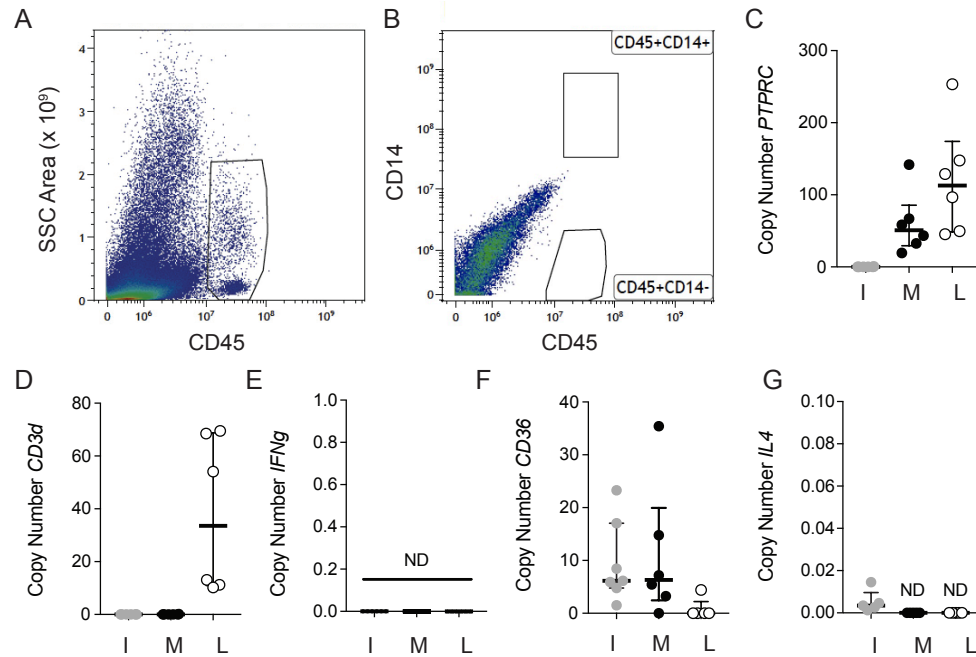

### Sorting of unique human islet leukocytes populations

*A*: Gating on SSC for granularity difference in all leukocytes CD45+ (black box, right panel). *B*: No antibody control. *C-D*: Validation of expression from FACS sorted mixed endocrine cells (CD45-, CD14-), macrophages (CD45+, CD14+), and lymphocytes (CD45+, CD14-). Quantification of mRNA levels used for validation of individual population identity shown in; leukocytes (macrophages and lymphocytes) *PTPRC* (ie., CD45) (*C*) and lymphocytes *CD3d* (*D*). Values are from n = 6 independent donor isolations (median ± interquartile range; \*P < 0.05 ANOVA followed by Tukey's test for multiple comparisons). *E-G*: Differences in gene expression between endocrine cells, macrophages, and lymphocytes for the following genes; *IFNγ* (*E*), *CD36* (*F*) and *IL4* (*G*). Values are from n = 6 independent donor isolations (median ± interquartile range; \*P < 0.05 ANOVA followed by Tukey's test for multiple comparisons).

**Figure S2**

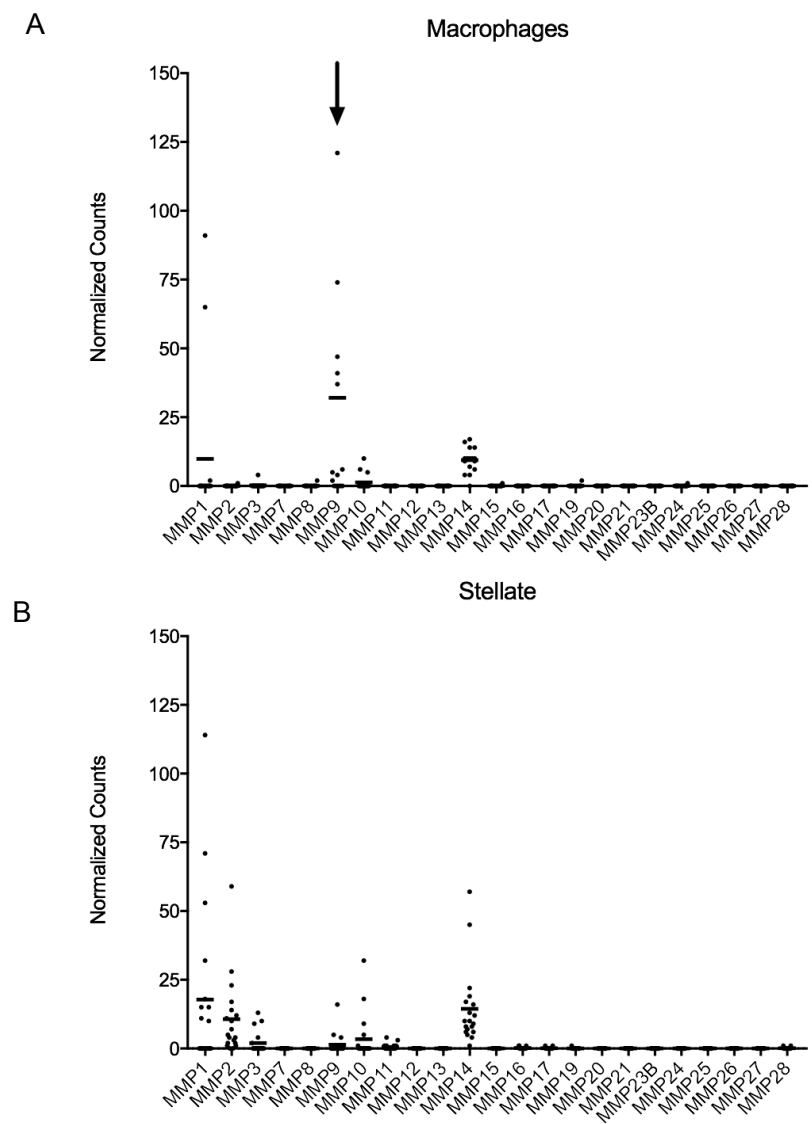

**Matrix metalloproteinase expression in human pancreas cell subsets**

*A* and *B*: Differences in macrophage (*A*) and activated stellate cell (*B*) gene counts in a subset of randomized single cells sorted from 4 human donors.

**Figure S3**

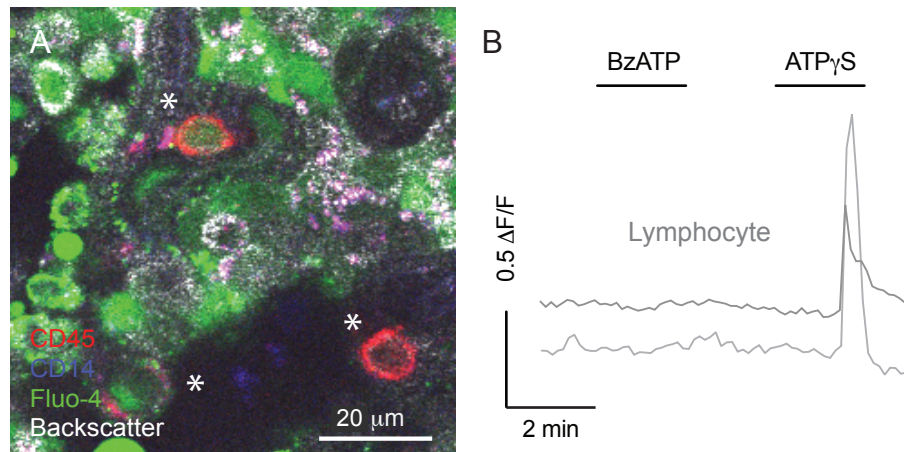

**Imaging of human tissue lymphocytes (CD45+, CD14-) in the pancreatic tissue microenvironment**

*A*: Confocal image taken during a live video recording of a living pancreatic tissue slice. The pancreatic tissue slice was incubated with the  $[Ca^{2+}]_i$  indicator Fluo-4 (green), as well as CD14 (blue), and CD45 (red). The reflective cellular structures (islet backscatter) represent endocrine tissue (grey). Stars (\*) denoting lymphocytes (CD45+, CD14-) were loaded with Fluo-4 (green).

*B*: Representative traces of individual pancreatic lymphocytes showing  $[Ca^{2+}]_i$  increases when exposed to ATP $\gamma$ S (100 M) but not to BzATP (10 M).

## Movie S4

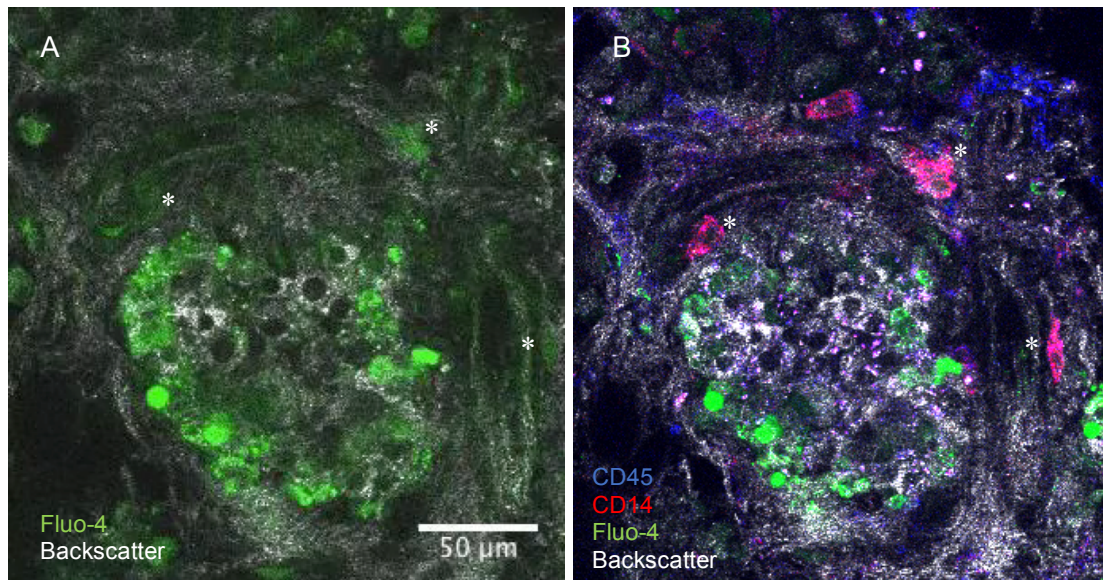

### **Live [Ca<sup>2+</sup>]<sub>i</sub> imaging of macrophage responses in a living human pancreatic tissue slice.**

*A*: Still frame image of a video recording with the [Ca<sup>2+</sup>]<sub>i</sub> indicator Fluo-4 (green). The reflective cellular structures (islet backscatter) represent endocrine tissue (grey). Stars (\*) denoting macrophages (CD45+, CD14+) were loaded with Fluo-4 (green). Video time starts at 00:00 displayed in minutes where 01:00 = 1 minute. *B*: Confocal image taken during a live video recording of a living pancreatic tissue slice. The pancreatic tissue slice was incubated with the [Ca<sup>2+</sup>]<sub>i</sub> indicator Fluo-4 (green), as well as CD14 (red), and CD45 (blue). The reflective cellular structures (islet backscatter) represent endocrine tissue (grey). Stars (\*) denoting macrophages (CD45+, CD14+) were loaded with Fluo-4 (green).

**Figure S5**

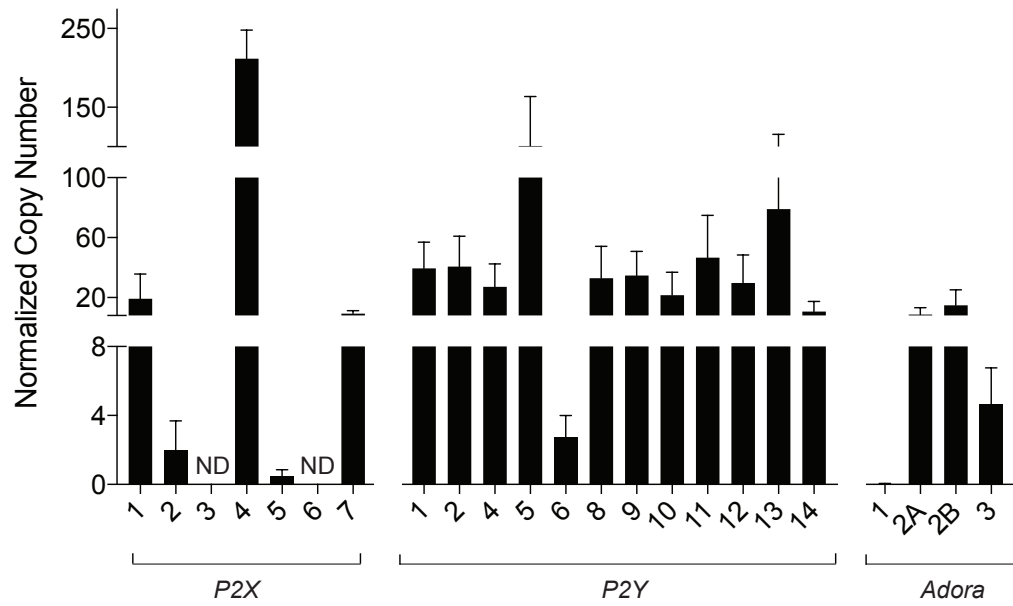

### **Purinergic gene expression in human islet macrophages**

Gene expression of purinergic (*P2RX*, *P2RY* and *Adora*) receptors found in human islet macrophages from n = 7 independent donors. Data are presented as mean +/- SEM.

**Figure S6**

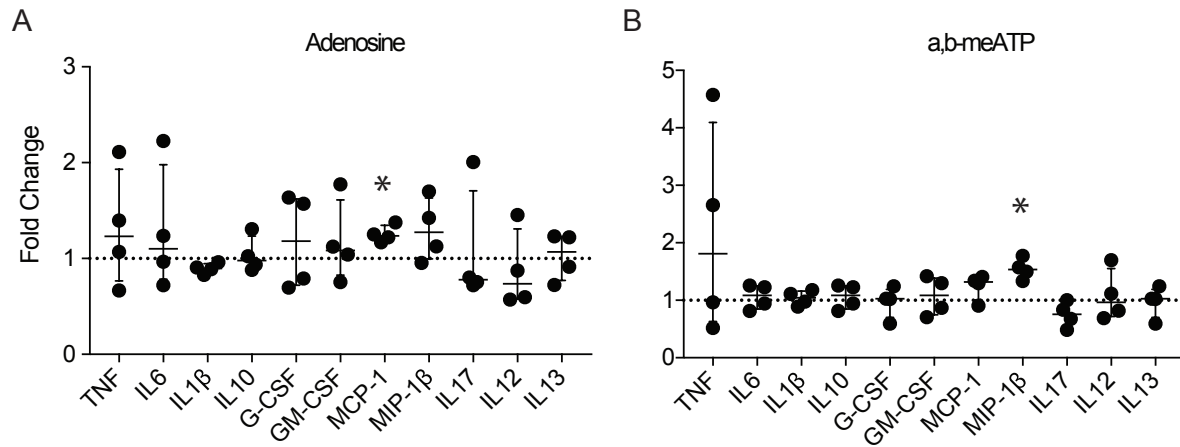

### Changes in macrophages secretory products during stimulation of purinergic signals

*A* and *B*: Cytokine secretion from isolated human islets. Concentrations of drugs (Adenosine 100  $\mu$ M), ( $\alpha,\beta$ -meATP 1  $\mu$ M). \* $P < 0.05$ , One sample t-test normalized to the control with a hypothetical value of 1, followed by Wilcoxon Signed Rank Test. Data are presented as mean  $\pm$  interquartile range.

**Figure S7**

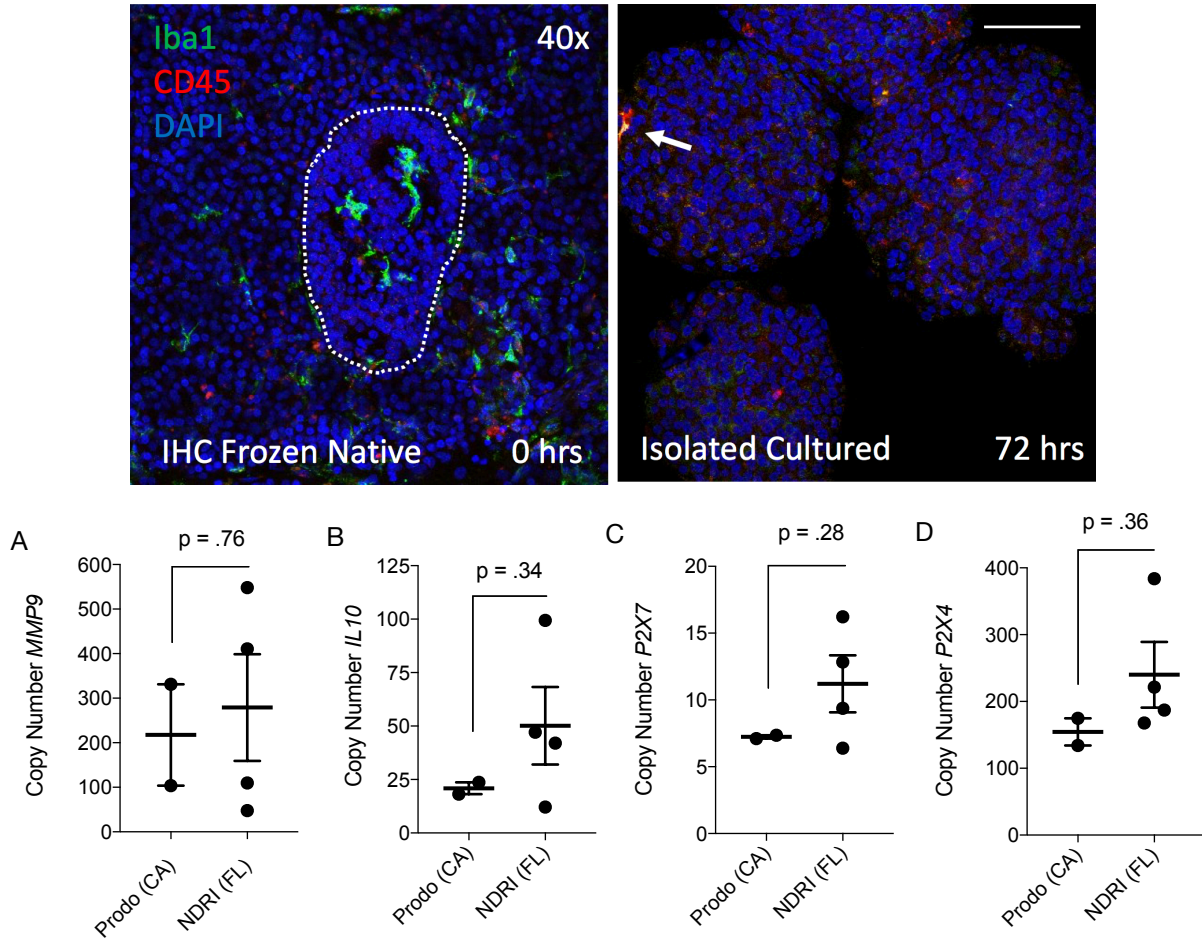

*A* and *B*: Isolating pancreatic islets induces loss of islet leukocytes. Macrophage (iba1, green) and leukocyte (CD45, red) markers are present in islets in slices but not in isolated islets cultured for 72 hours (B). Dotted line in A denotes pancreatic islet. Scale bar = 40  $\mu$ m, applies to A and B.

*C*: No differences could be detected in macrophage gene expression between islets from Prodo in California and the local facility at the Diabetes Research Institute. There were no differences in gene expression ( $CT - [CT_{\text{gene}(x)} - CT_{\text{(housekeeping)}}]$ ) for *MMP9*, *IL10*, *P2X7* and *P2X4*. For islets shipped from California, a “rest” period was added after shipping for a total 16-24 hours. Islets obtained in Miami were incubated at 22°C for 16-24 hours. Notice that sample sizes were small.



## Movie S8

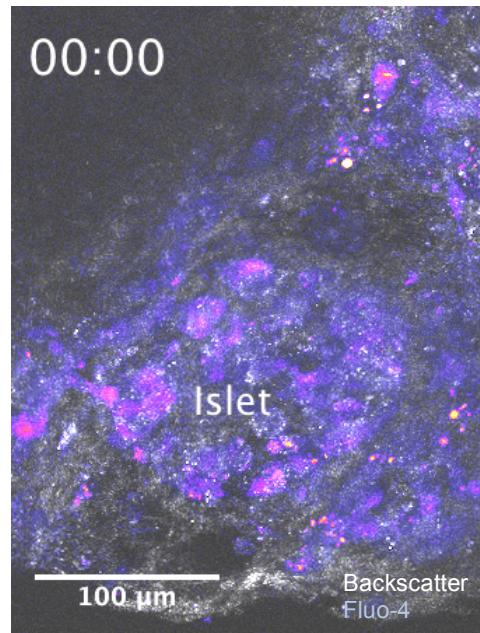

### **Live imaging of human islet lymphocyte translational movement via a vasculature scaffold.**

Still frame image of a video recording of a maximal projection image taken during a live video recording of a living pancreatic tissue slice. The  $[Ca^{2+}]_i$  indicator Fluo-4 is displayed in a pseudocolor scale where the amount of  $[Ca^{2+}]_i$  is related to the fluorescent intensity. The reflective cellular structures (islet backscatter) represent endocrine tissue (grey). Stars (\*) denoting lymphocytes (CD45+, CD14-) were identified *a priori*, based on antibody labeling. Video time starts at 00:00 displayed in minutes where 01:00 = 1 minute.



**Figure S9**

| <u>Donor – Islet Isolation</u> | <u>Age</u> | <u>Gender</u> | <u>Height</u> | <u>Weight</u> | <u>BMI</u> | <u>COD</u>  | <u>Source</u>          | <u>Diabetic</u> |
|--------------------------------|------------|---------------|---------------|---------------|------------|-------------|------------------------|-----------------|
| HP2297                         | 56         | F             | 67            | 170           | 26.6       | Stroke      | DRI                    | No              |
| HP2298                         | 49         | M             | 70            | 181           | 26         | ICH/Stroke  | DRI                    | No              |
| HP18232-CTRL                   | 33         | F             | 68            | 200           | 30.3       | Head Trauma | Prodo                  | No              |
| HP2299                         | 49         | M             | 65            | 169.6         | 28.3       | Anoxia      | DRI                    | No              |
| HP2303                         | 48         | M             | 69            | 165           | 24.4       | Head Trauma | DRI                    | No              |
| HP-18310-01                    | 38         | M             | 69            | 190           | 28         | Head Trauma | Prodo                  | No              |
| HP1695                         | 55         | F             | x             | x             | 32         | CNS Tumor   | DRI                    | No              |
| HP1697                         | 50         | M             | x             | x             | 27         | Brain Tumor | DRI                    | No              |
| HP18212-01T2D                  | 40         | M             | 69            | 185           | 27.7       | Stroke      | Prodo                  | Yes             |
| HP18243-01T2D                  | 51         | M             | 65            | 228           | 37.1       | Anoxia      | Prodo                  | Yes             |
| HP-18275-01T2D                 | 30         | F             | 64            | 233           | 40.1       | Asthma      | Prodo                  | Yes             |
| HP-19051-01T2D                 | 53         | M             | 65            | 190           | 30.1       | Head Trauma | Prodo                  | Yes             |
| <u>Donor - Tissue Slices</u>   |            |               |               |               |            |             |                        |                 |
| HP6462                         | 13         | F             | x             | x             | 15.2       | Anoxia      | nPOD                   | No              |
| HP2298                         | 49         | M             | 70            | 181           | 26         | ICH/Stroke  | DRI                    | No              |
| HP2299                         | 49         | M             | 65            | 169.6         | 28.3       | Anoxia      | DRI                    | No              |
| HP2303                         | 48         | M             | 69            | 165           | 24.4       | Head Trauma | DRI                    | No              |
| HP6468                         | 16         | M             | x             | x             | 15.8       | Anoxia      | nPOD                   | No              |
| <u>Donor - IHC</u>             |            |               |               |               |            |             |                        |                 |
| HP2111A                        | 31         | M             | 75            | 254           | 31.7       | Head Trauma | NE Organ Bank          | No              |
| HP2096A                        | 51         | F             | 63            | 145           | 25.7       | Head Trauma | NE Organ Bank          | No              |
| HP2102A                        | 43         | F             | 62            | 129.3         | 23.6       | Stoke       | Live Share of Carolina | No              |
| HP2116A                        | 53         | M             | 69            | 196           | 28.9       | Head Trauma | NDRI                   | No              |
| HP2117A                        | 28         | M             | 74            | 165.3         | 21.1       | Head Trauma | IIAM                   | No              |
| HP2119A                        | 69         | F             | 64            | 204           | 35         | Stroke      | Live Link of Florida   | Yes             |

**Figure S10**

| <u>Surface Marker</u>               | <u>Citation</u>                                                                       |
|-------------------------------------|---------------------------------------------------------------------------------------|
| CD11b                               | Butcher et al., 2014                                                                  |
| CD11c                               | Butcher et al., 2014                                                                  |
| MHC-II                              | Ehses et al., 2007                                                                    |
| CD68                                | Ehses et al., 2007; Richardson et al., 2009; Kamata et al., 2014, Eguchi et al., 2016 |
| CD14                                | **                                                                                    |
| CD45                                | Butcher et al., 2014, **                                                              |
| CD86                                | Butcher et al., 2014                                                                  |
| CD163                               | Ehses et al., 2007; Kamata et al., 2014                                               |
| CD204                               | Kamata et al., 2014                                                                   |
| CD206                               | **                                                                                    |
| ** identified in current manuscript |                                                                                       |

**Figure S11**

| <u>Gene ID</u> | <u>Probe</u>  | <u>Gene ID</u> | <u>Probe</u>  |
|----------------|---------------|----------------|---------------|
| p2rx1          | Hs01039860_g1 | ADORA2B        | Hs00386497_m1 |
| p2rx2          | Hs04176268_g1 | ADORA3         | Hs00181232_m1 |
| p2rx3          | Hs01125554_m1 | IL1B           | Hs01555410_m1 |
| p2rx4          | Hs00902156_g1 | TNF            | Hs00174128_m1 |
| p2rx5          | Hs01112471_m1 | IFNy           | Hs00989291_m1 |
| p2rx6          | Hs01003997_m1 | IL6            | Hs00174131_m1 |
| p2rx7          | Hs00175721_m1 | iNOS           | Hs01075529_m1 |
| p2ry1          | Hs00704965_s1 | IL-10          | Hs00961622_m1 |
| p2ry2          | Hs01856611_s1 | IL-4           | Hs00174122_m1 |
| p2ry4          | Hs00267404_s1 | ARG            | Hs00163660_m1 |
| p2ry5          | Hs00271758_s1 | PTPRC          | Hs04189704_m1 |
| p2ry6          | Hs00366312_m1 | CSF1R          | Hs00911250_m1 |
| p2ry8          | Hs01938524_s1 | CD3D           | Hs00174158_m1 |
| p2ry9          | Hs00271072_s1 | CD19           | Hs01047413_g1 |
| p2ry10         | Hs00274326_s1 | GAPDH          | Hs02786624_g1 |
| p2ry11         | Hs00267414_s1 | ITGAM          | Hs00167304_m1 |
| p2ry12         | Hs01881698_s1 | MMP9           | Hs01548727_m1 |
| p2ry13         | Hs00256749_s1 | MMP2           | Hs00957562_m1 |
| p2ry14         | Hs01848195_s1 | AMYLIN         | Hs00169095_m1 |
| ADORA1A        | Hs00181231_m1 | CD36           | Hs00354519_m1 |
| ADORA2A        | Hs00169123_m1 | INS            | Hs00355773_m1 |
